# Supplementary material for: Ecological Sorption of Iron and Sulfate Ions onto Starch and Chitosan Biopolymer Blend
Source: MDPI journal article supplement (doi:10.3390/polysaccharides4030019), 2023-09-12
Supplement: s1 [file s1]

# Supplementary Materials

## S1. Charge density

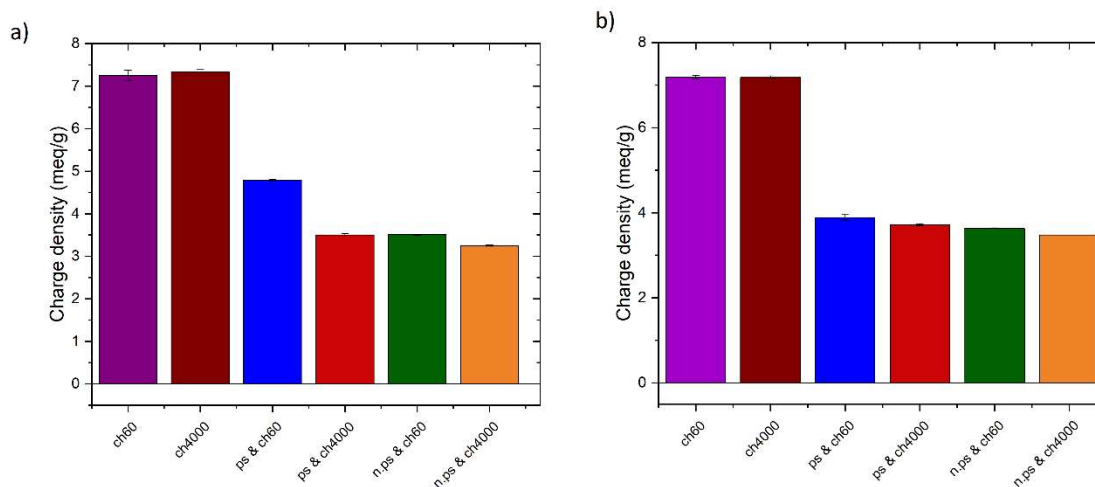

**Figure S1.** Charge densities of the different studied particles in dependence of pH of ch60 (purple), ch4000 (brown), ps & ch60 (dark blue), ps & ch4000 (red), n.ps & ch60 (green), and n.ps & ch4000 (orange) at (a) pH 1, and (b) pH 3.

## S2. ATR-FTIR

**Table S1.** ATR-FTIR vibrations mode for chitosan-starch samples.

| Wavenumber (cm <sup>-1</sup> ) | Vibration mode                                               |
|--------------------------------|--------------------------------------------------------------|
| 3350 - 3291                    | O-H, NH stretching, and intermolecular hydrogen bonding      |
| 2921                           | CH <sub>2</sub> vas                                          |
| 2864                           | CH <sub>2</sub> vs                                           |
| 1648                           | C-O stretching                                               |
| 1585                           | hydrogen bonding between OH and NH <sub>3</sub> <sup>+</sup> |
| 1457-1417                      | CH <sub>2</sub> bending                                      |
| 1379                           | NH <sub>2</sub> bending (II), and C-O-O                      |
| 1153-1060                      | C-O stretching                                               |
| 655                            | NH and OH bending                                            |

## S3. BET-Measurments

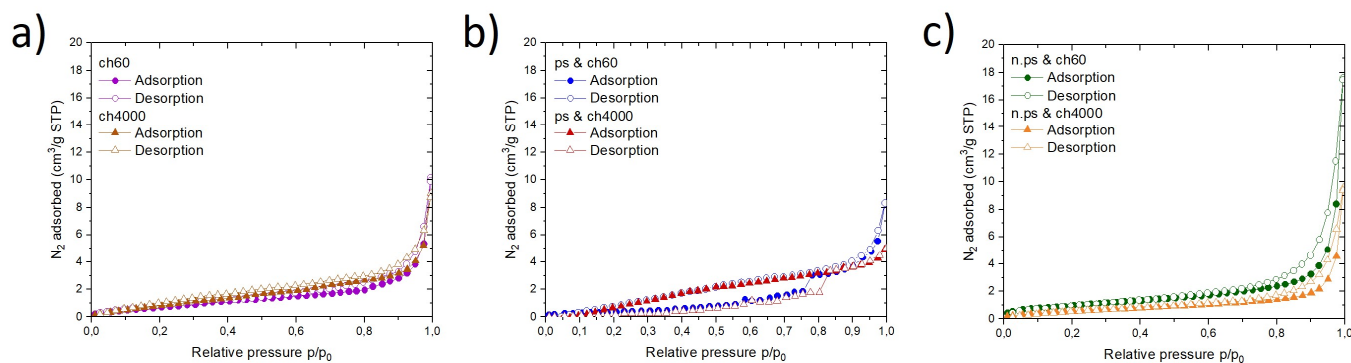

**Figure S2.** Nitrogen sorption isotherms at 77 K of (a) ch60 (purple), ch4000 (brown), (b) ps & ch60 (dark blue), ps & ch4000 (red), (c) n.ps & ch60 (green), and n.ps & ch4000 (orange).

**Table S2.** Surface area of the used samples using BET.

| Sample        | Surface area (m <sup>2</sup> /g) |
|---------------|----------------------------------|
| ch60          | 3                                |
| ch4000        | 4                                |
| ps & ch60     | 1                                |
| ps & ch4000   | 1                                |
| n.ps & ch60   | 3                                |
| n.ps & ch4000 | 4                                |

#### S4. TGA of the samples

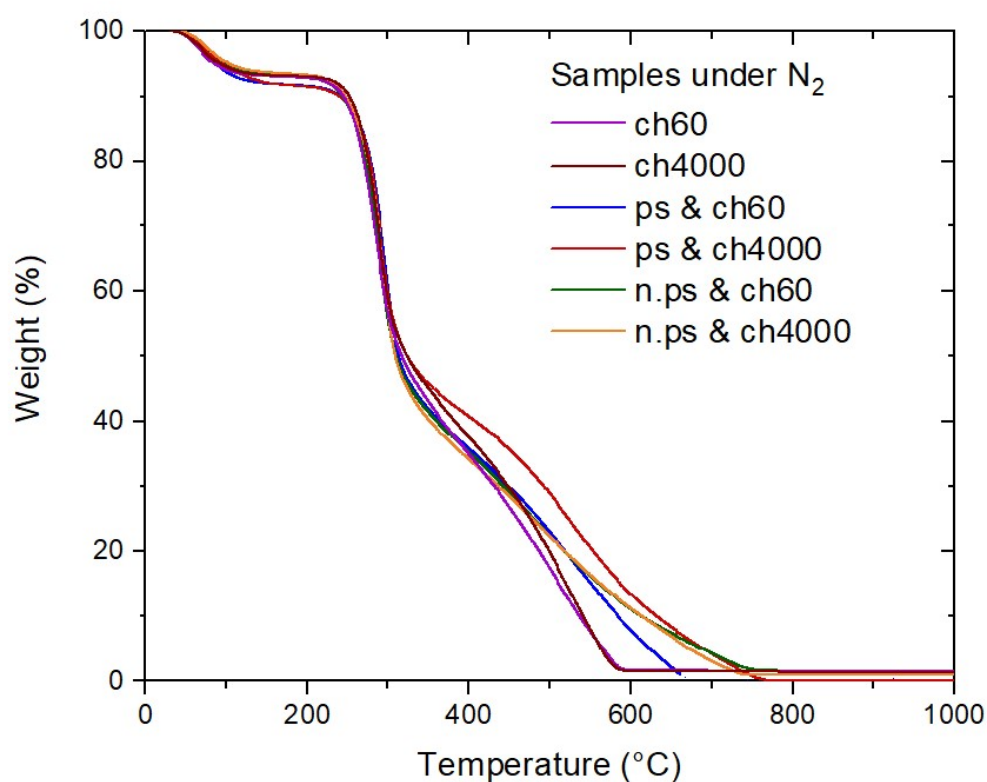

**Figure S3.** Thermogravimetric analysis under N<sub>2</sub> of ch60 (purple), ch4000 (brown), ps & ch60 (dark blue), ps & ch4000 (red), n.ps & ch60 (green), and n.ps & ch4000 (orange).

#### S5. Particle size distribution of n.ps in suspension

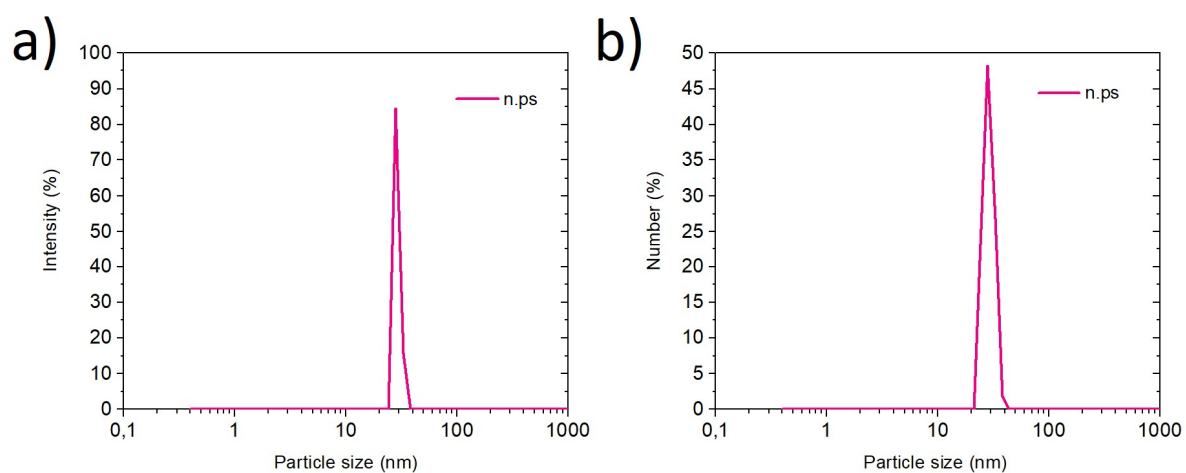

**Figure S4.** Particle size measurement of n.ps (a) intensity distribution and (b) number distribution.

## S6. SEM-EDX analyses of samples before adsorption

### S6.1. SEM-EDX elemental mappings from ps & ch60

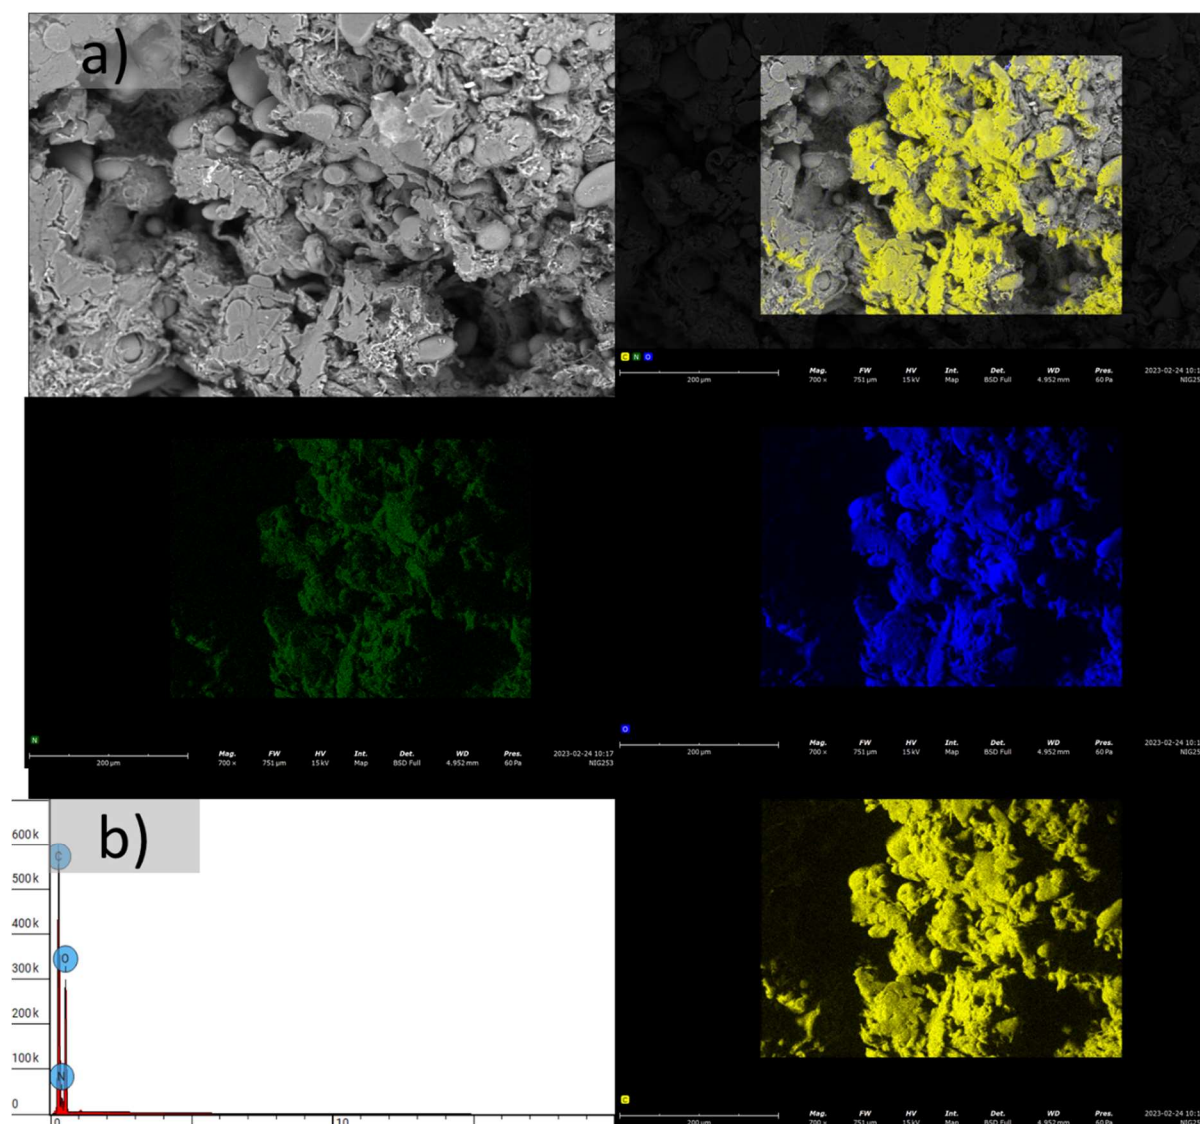

**Figure S5.** ( a) SEM images and SEM-EDX elemental mappings from ps & ch60,( b) sum spectrum.

**Table S3.** Percent atomic and weight concentrations of iron and sulfur onto the surface area of ps & ch60.

| Element Number | Element Symbol | Element Name | Atomic Conc. (%) | Weight Conc. (%) |
|----------------|----------------|--------------|------------------|------------------|
| 6              | C              | Carbon       | 45.046           | 39.117           |
| 7              | N              | Nitrogen     | 18.714           | 18.957           |
| 8              | O              | Oxygen       | 36.240           | 41.926           |

*S6.2. SEM images and SEM-EDX elemental mappings from ps & ch4000*

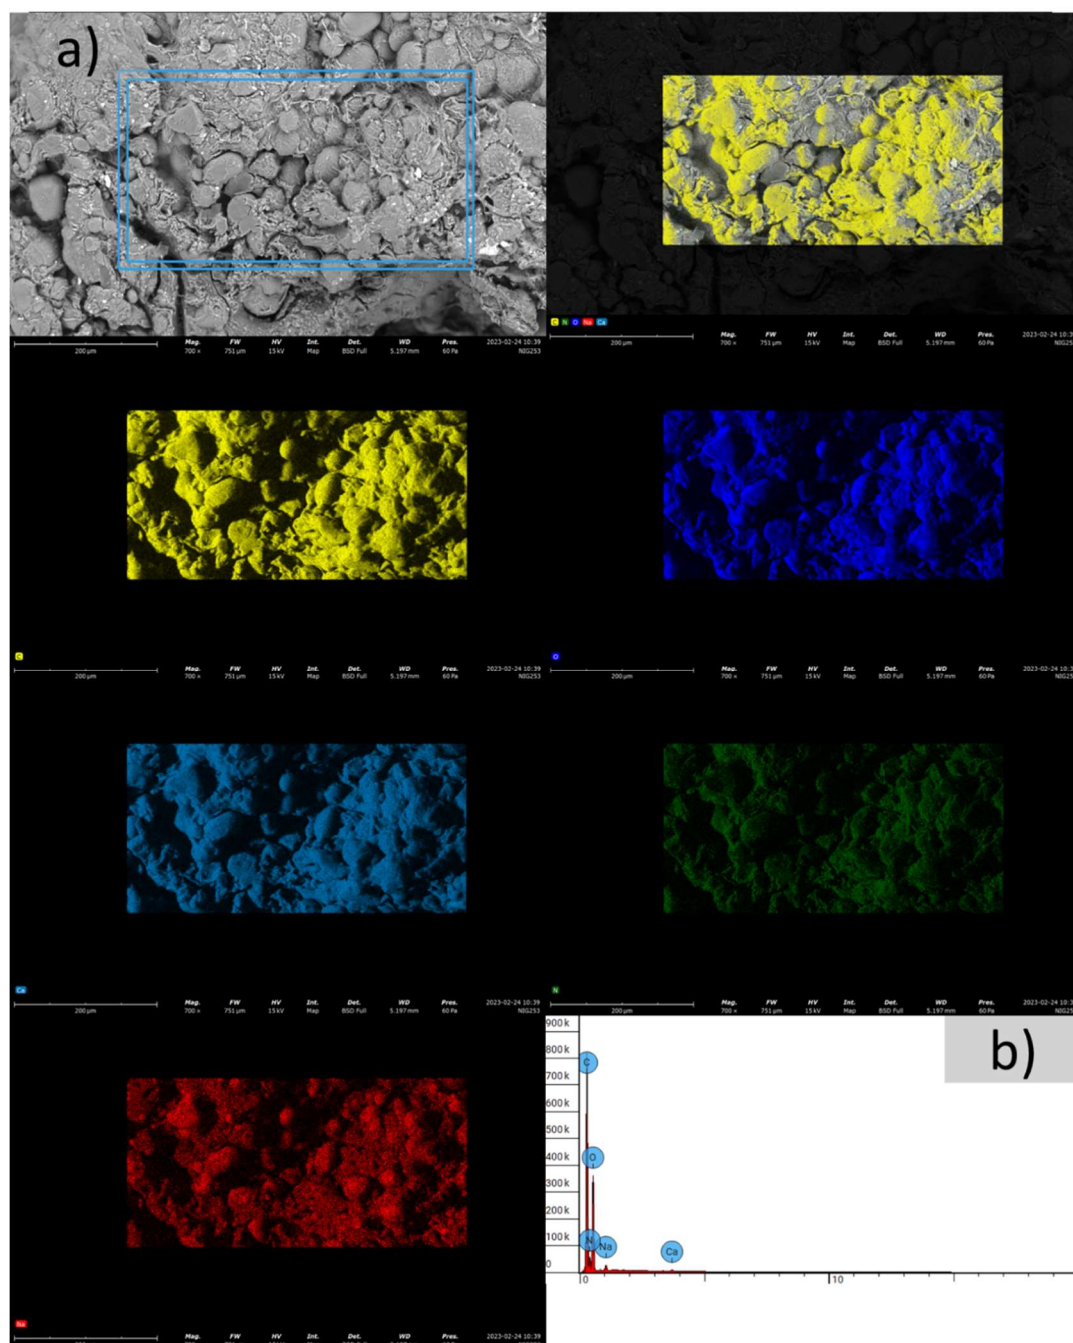

**Figure S6.** (a) SEM images and SEM-EDX elemental mappings from ps & ch4000, (b) sum spectrum.



**Table S4.** Percent atomic and weight concentrations of iron and sulfur onto the surface area of ps & ch4000.

| Element Number | Element Symbol | Element Name | Atomic Conc. (%) | Weight Conc. (%) |
|----------------|----------------|--------------|------------------|------------------|
| 6              | C              | Carbon       | 42.033           | 36.000           |
| 7              | N              | Nitrogen     | 18.917           | 18.900           |
| 8              | O              | Oxygen       | 38.387           | 43.800           |
| 11             | Na             | Sodium       | 0.488            | 0.800            |

*S6.3. SEM images and SEM-EDX elemental mappings from n.ps & ch60*

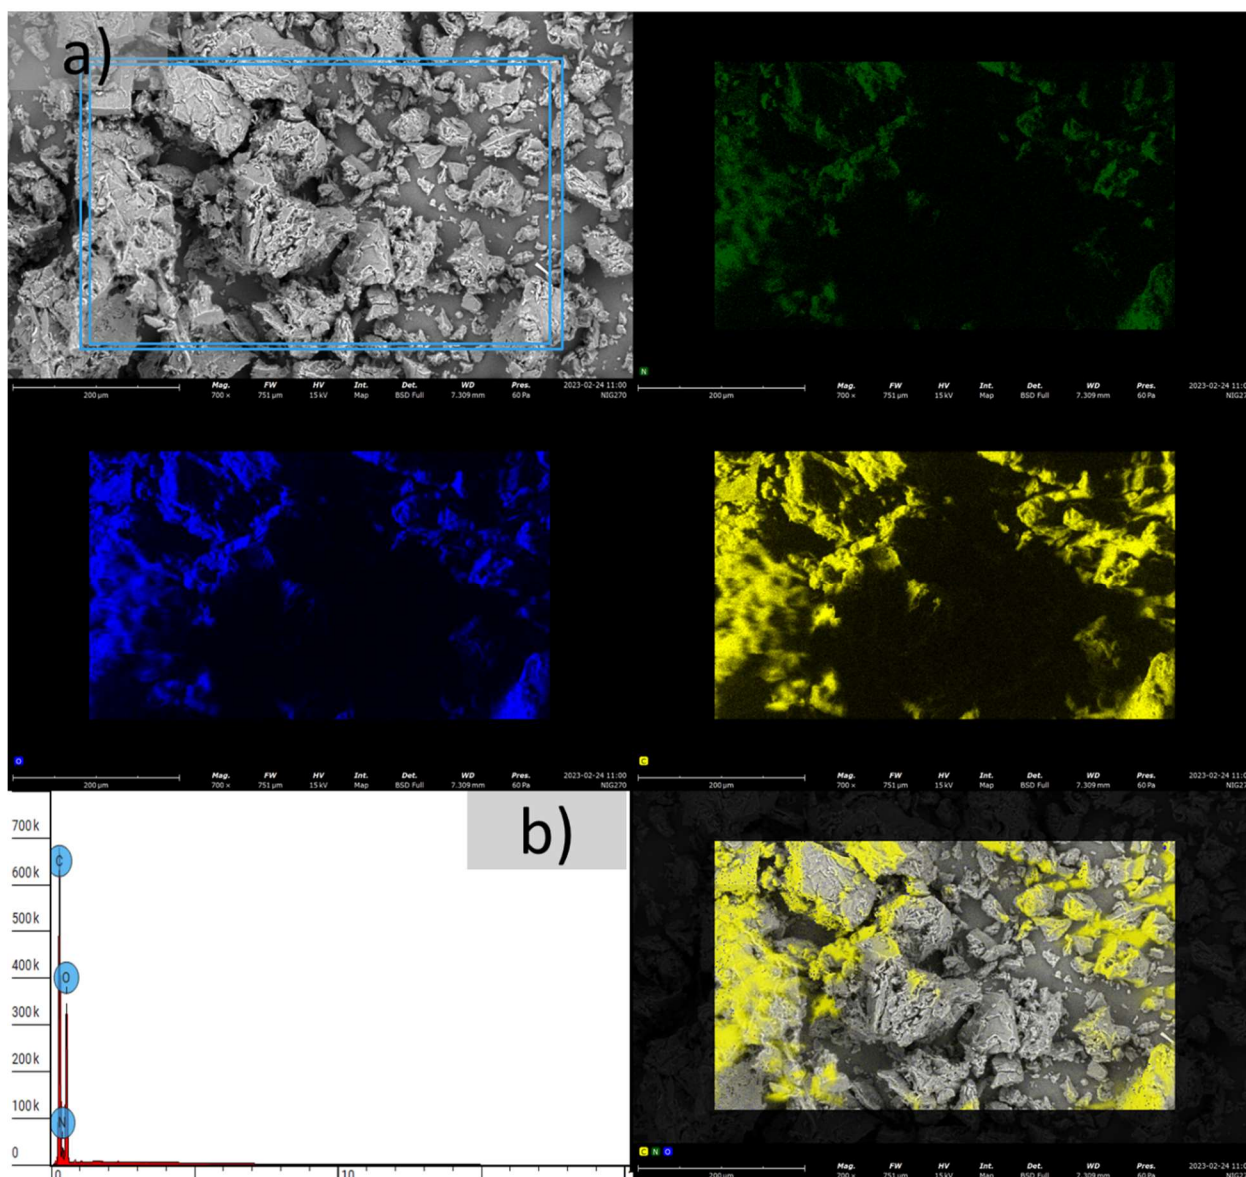

**Figure S7.** (a) SEM images and SEM-EDX elemental mappings from n. ps & ch60,(b) sum spectrum.

**Table S5.** Percent atomic and weight concentrations of iron and sulfur onto the surface area of n.ps & ch60.

| Element Number | Element Symbol | Element Name | Atomic Conc. (%) | Weight Conc. (%) |
|----------------|----------------|--------------|------------------|------------------|
| 6              | C              | Carbon       | 46.011           | 39.980           |
| 7              | N              | Nitrogen     | 17.201           | 17.435           |
| 8              | O              | Oxygen       | 36.788           | 42.585           |

#### S6.4. SEM images and SEM-EDX elemental mappings from n.ps & ch4000

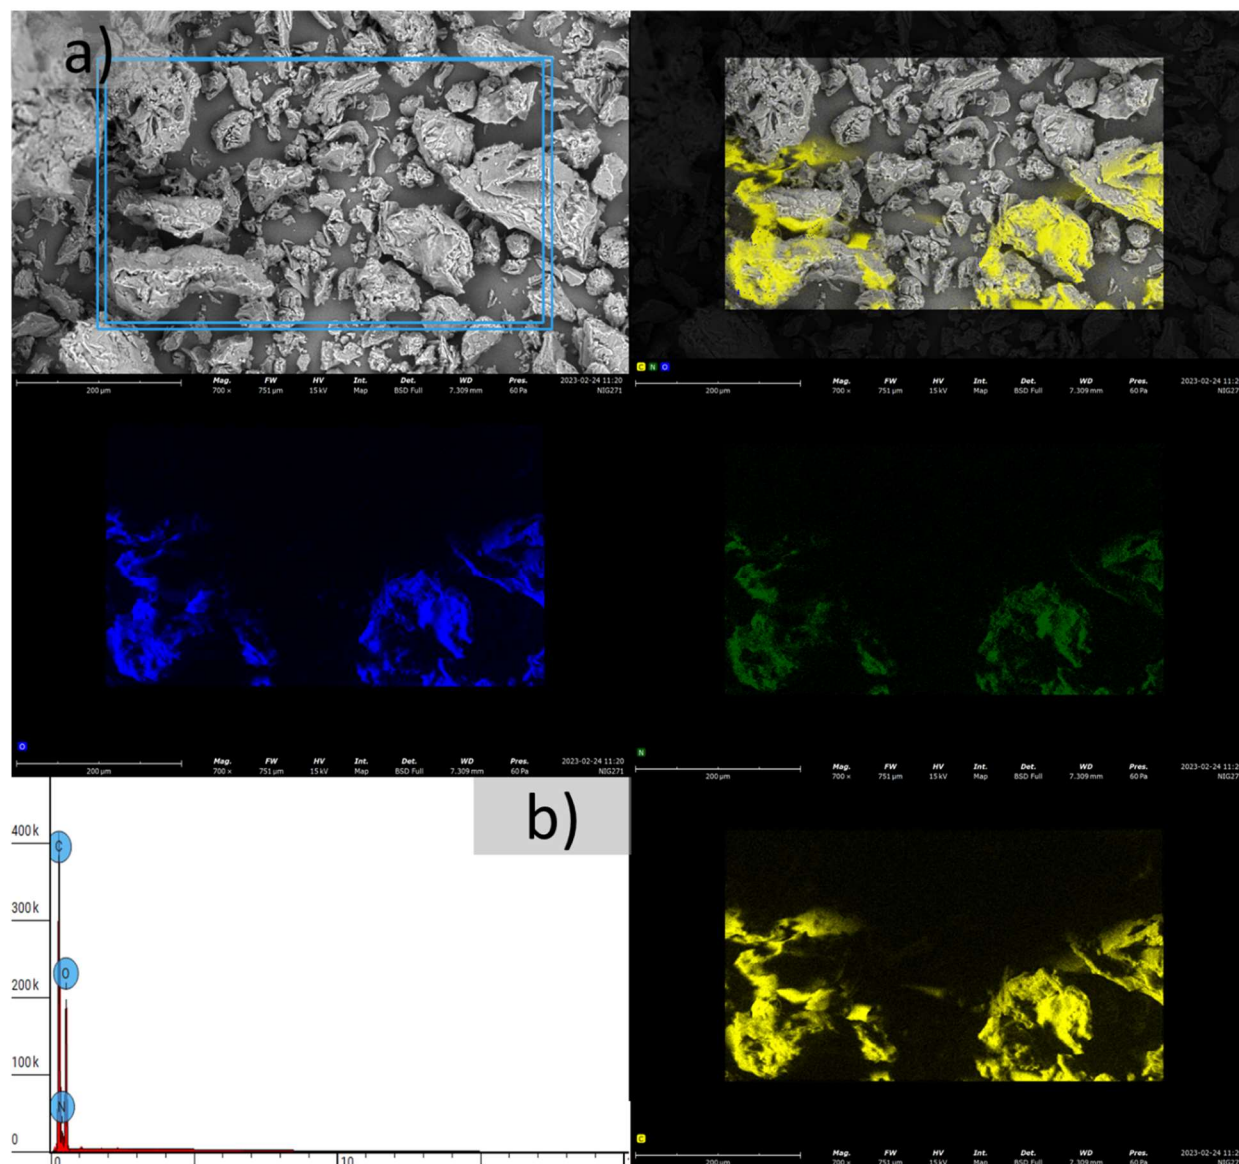

**Figure S8.** ( a) SEM images and SEM-EDX elemental mappings from n. ps & ch4000,( b) sum spectrum.

**Table S6.** Percent atomic and weight concentrations of iron and sulfur onto the surface area of n.ps & ch4000.

| Element Number | Element Symbol | Element Name | Atomic Conc. (%) | Weight Conc. (%) |
|----------------|----------------|--------------|------------------|------------------|
| 6              | C              | Carbon       | 45.262           | 39.357           |
| 7              | N              | Nitrogen     | 19.202           | 19.478           |
| 8              | O              | Oxygen       | 35.535           | 41.165           |



## S7. SEM-EDX analyses of samples after adsorption

### S7.1. SEM-EDX elemental mappings from ps & ch60

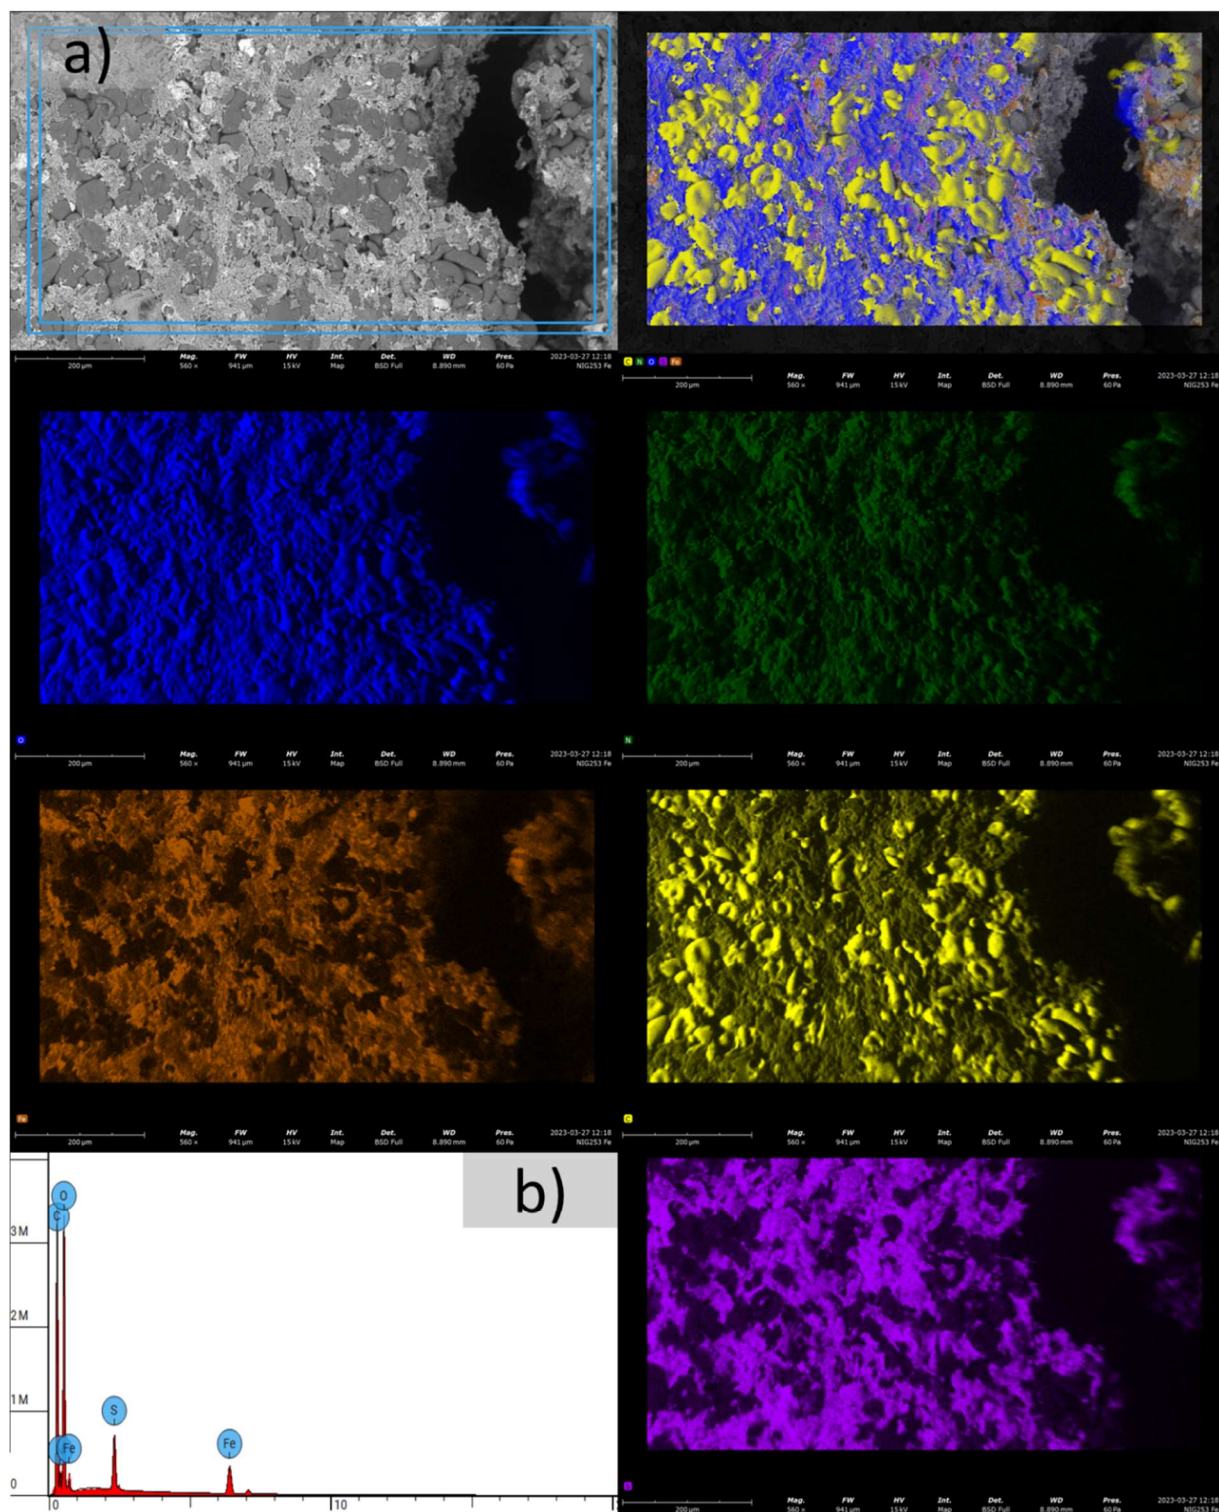

**Figure S9.** (a) SEM images and SEM-EDX elemental mappings from ps & ch60, (b) sum spectrum at a concentration of  $\text{Fe}^{2+/3+}$  1000 mg/L.

**Table S7.** Percent atomic and weight concentrations of iron and sulfur onto the surface area of ps & ch60.

| Element Number | Element Symbol | Element Name | Atomic Conc. (%) | Weight Conc. (%) |
|----------------|----------------|--------------|------------------|------------------|
| 6              | C              | Carbon       | 48.090           | 37.400           |
| 8              | O              | Oxygen       | 47.776           | 49.500           |
| 16             | S              | Sulfur       | 1.204            | 2.500            |
| 26             | Fe             | Iron         | 2.931            | 10.600           |

*S7.2. SEM-EDX elemental mappings from ps & ch4000*

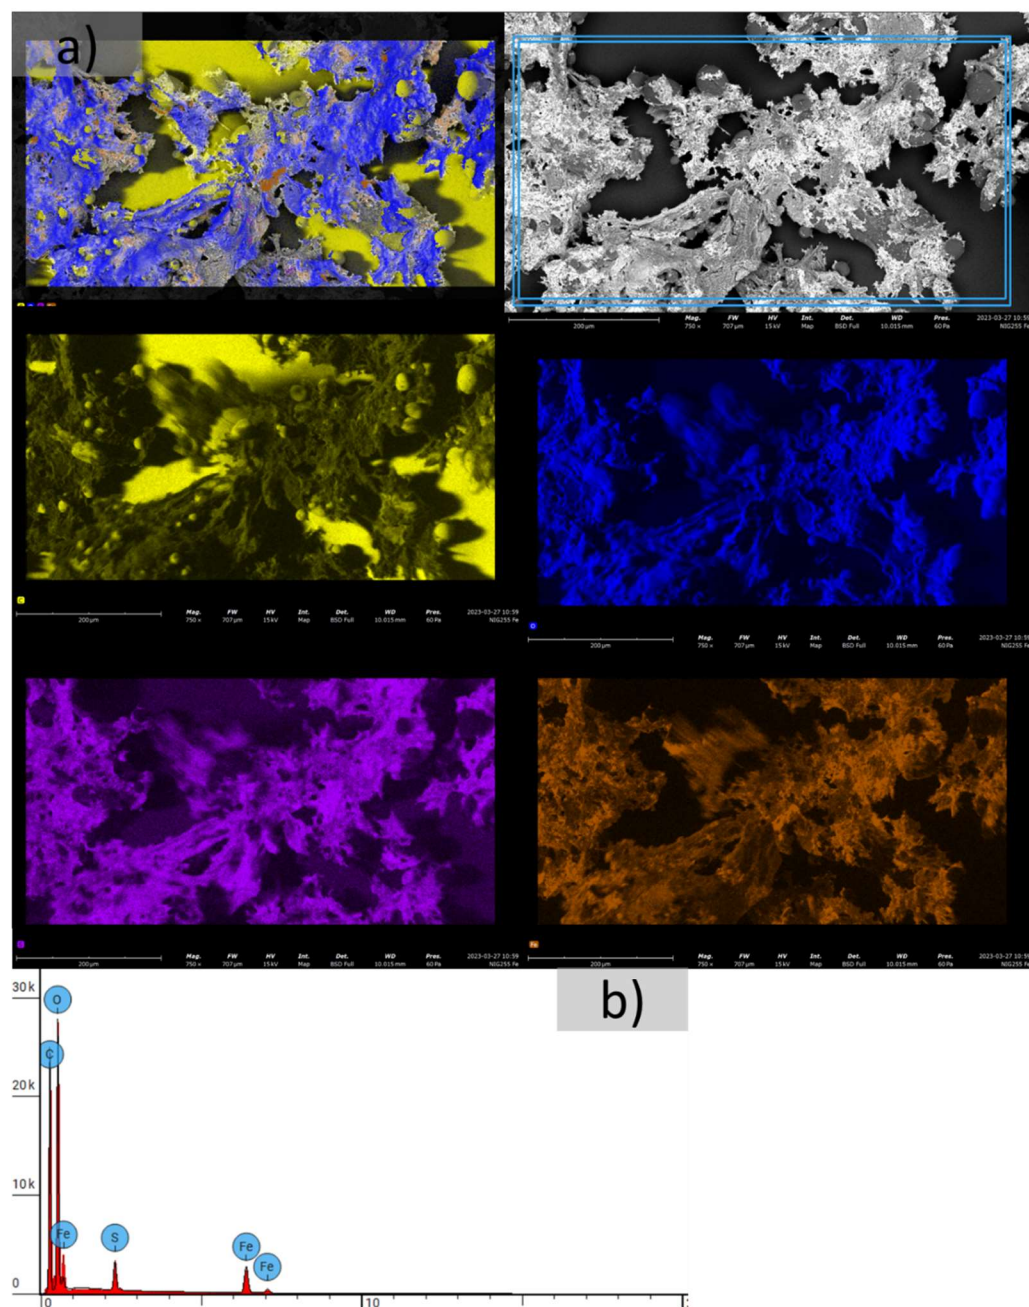

**Figure S10.** SEM images and SEM-EDX elemental mappings from ps & ch4000, (b) sum spectrum at a concentration of  $\text{Fe}^{2+/3+}$  1000 mg/L.



**Table S8.** Percent atomic and weight concentrations of iron and sulfur onto the surface area of ps & ch4000.

| Element Number | Element Symbol | Element Name | Atomic Conc. (%) | Weight Conc. (%) |
|----------------|----------------|--------------|------------------|------------------|
| 6              | C              | Carbon       | 59.357           | 44.845           |
| 8              | O              | Oxygen       | 34.013           | 34.234           |
| 16             | S              | Sulfur       | 1.588            | 3.203            |
| 26             | Fe             | Iron         | 5.043            | 17.718           |

*S7.3. SEM-EDX elemental mappings from n.ps & ch60*

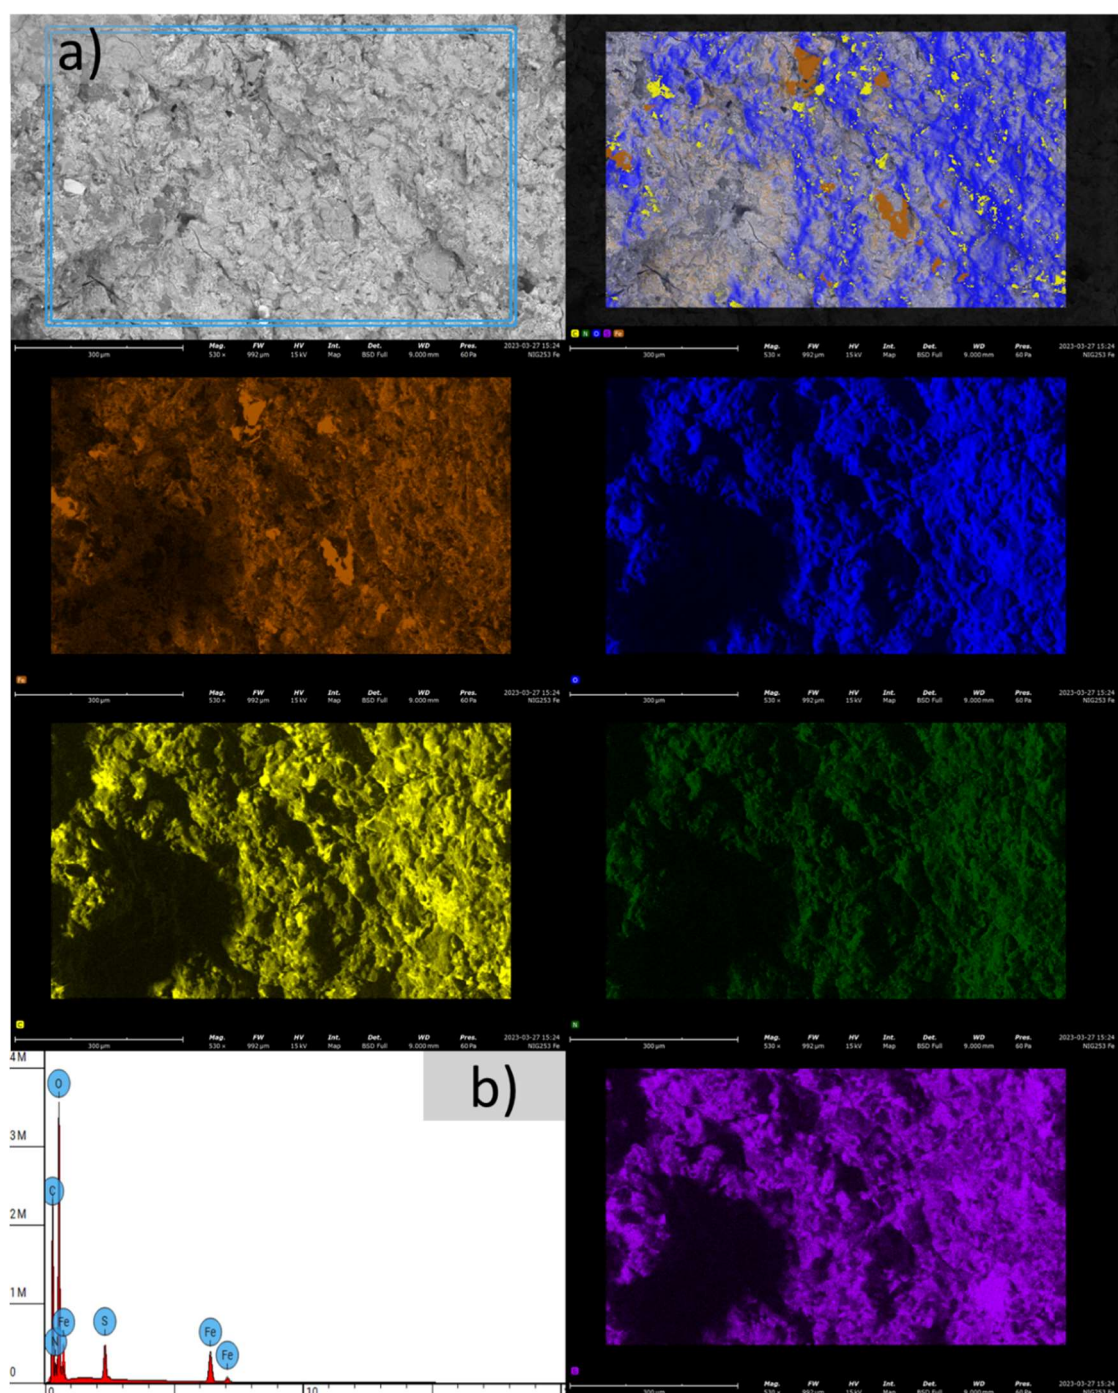

**Figure S11.** SEM images and SEM-EDX elemental mappings from n.ps & ch60,( b) sum spectrum at a concentration of  $\text{Fe}^{2+/3+}$  1000 mg/L.

**Table S9.** Percent atomic and weight concentrations of iron and sulfur onto the surface area of n.ps & ch60.

| Element Number | Element Symbol | Element Name | Atomic Conc. (%) | Weight Conc. (%) |
|----------------|----------------|--------------|------------------|------------------|
| 6              | C              | Carbon       | 42.056           | 32.533           |
| 7              | N              | Nitrogen     | 8.098            | 7.307            |
| 8              | O              | Oxygen       | 45.264           | 46.647           |
| 16             | S              | Sulfur       | 1.938            | 4.004            |
| 26             | Fe             | Iron         | 2.644            | 9.510            |

#### S7.4. SEM-EDX elemental mappings from n.ps & ch4000

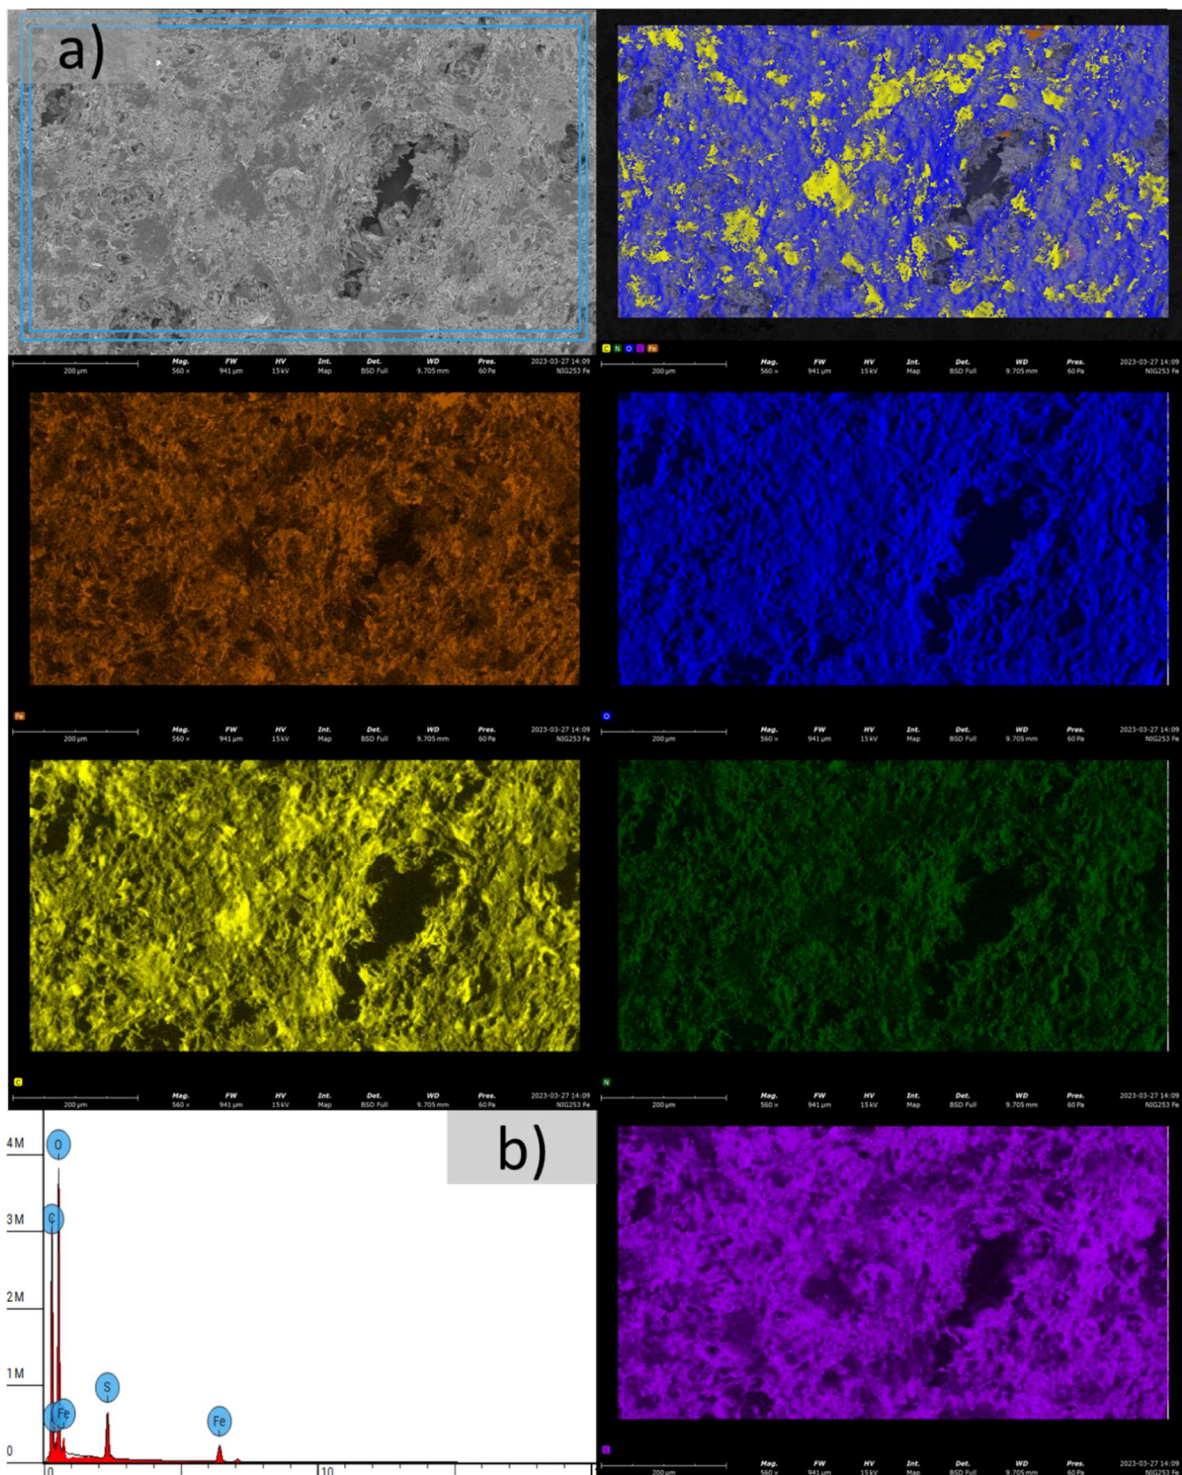

**Figure S12.** SEM images and SEM-EDX elemental mappings from n.ps & ch4000, (b) sum spectrum at a concentration of  $\text{Fe}^{2+/3+}$  1000 mg/L.



**Table S10.** Percent atomic and weight concentrations of iron and sulfur onto the surface area of n.ps & ch4000.

| Element Number | Element Symbol | Element Name | Atomic Conc (%). | Weight Conc. (%) |
|----------------|----------------|--------------|------------------|------------------|
| 6              | C              | Carbon       | 37.156           | 27.300           |
| 7              | N              | Nitrogen     | 11.667           | 10.000           |
| 8              | O              | Oxygen       | 45.155           | 44.200           |
| 16             | S              | Sulfur       | 1.427            | 2.800            |
| 26             | Fe             | Iron         | 4.595            | 15.700           |

#### S8. Change of color of samples

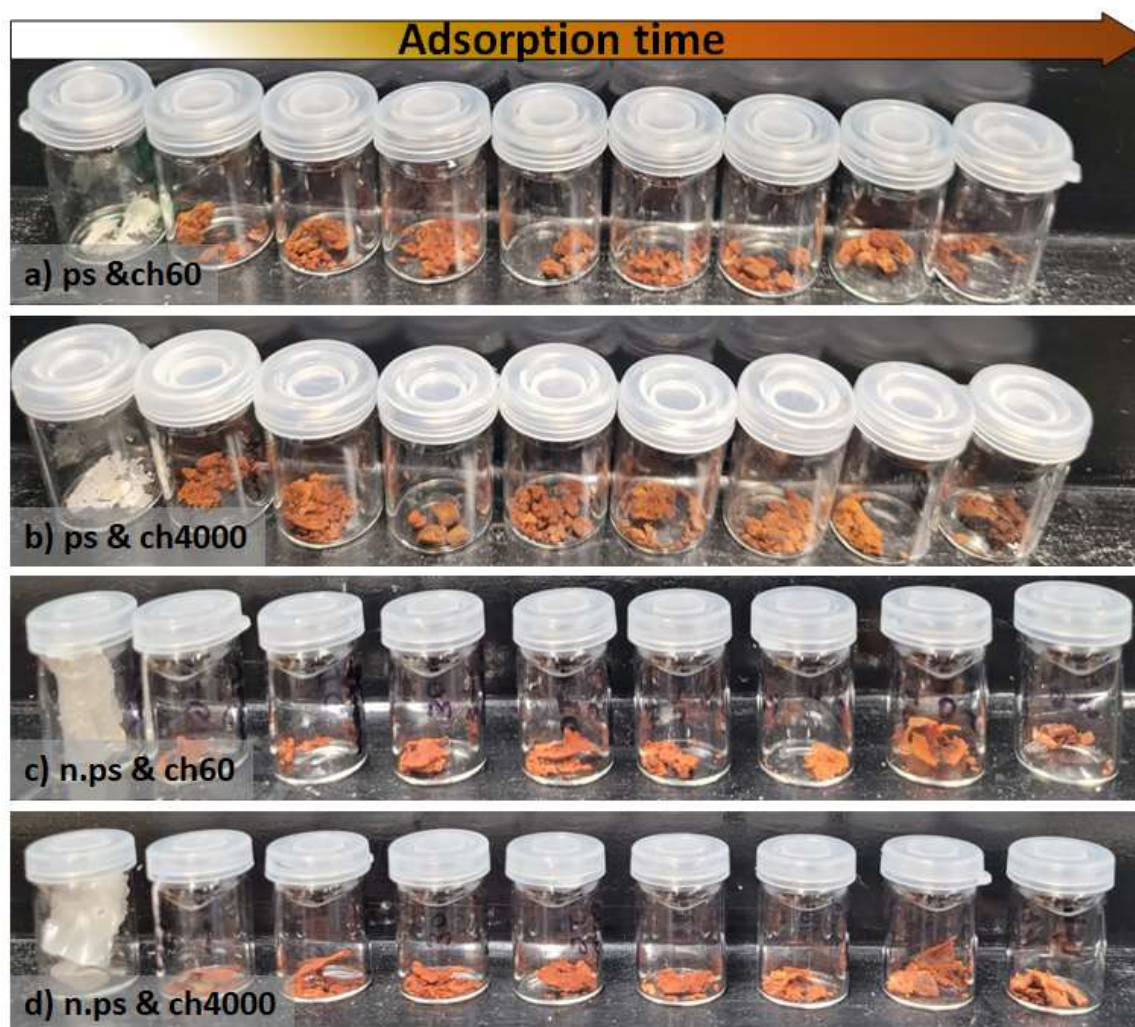

**Figure S13.** Change of color of samples at a concentration of iron 1000 mg/L and sulfate 1720 mg/L from  $\text{FeSO}_4$  in dependence of time from 10 min to 24 h onto (a) ps. & ch60, (b) ps & ch4000, (c) n.ps & ch60, and (d) n.ps & ch4000 at room temperature and  $\text{pH}_0$  4.26.

### S9. Adsorption isotherms of $\text{FeSO}_4$ onto ch60 and ch4000

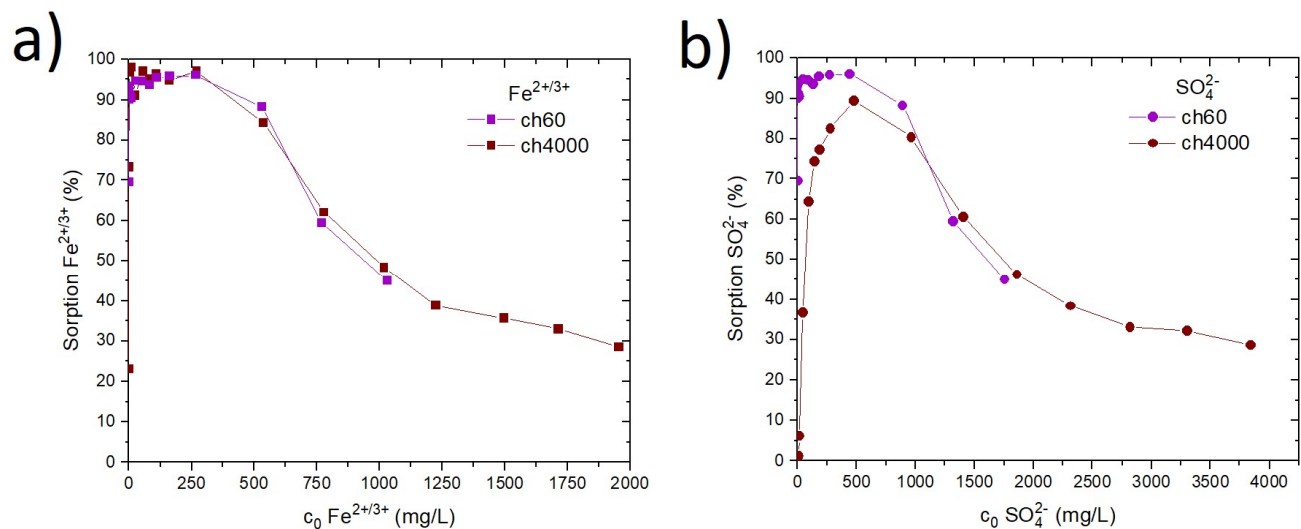

**Figure S14.** (a) Percentage adsorption of  $\text{Fe}^{2+/3+}$  and (b) percentage adsorption of  $\text{SO}_4^{2-}$  from  $\text{FeSO}_4$  solution for ch60 (purple), and (b) ch4000 (brown).

### S10. Adsorption capacity of ch60 and ch4000

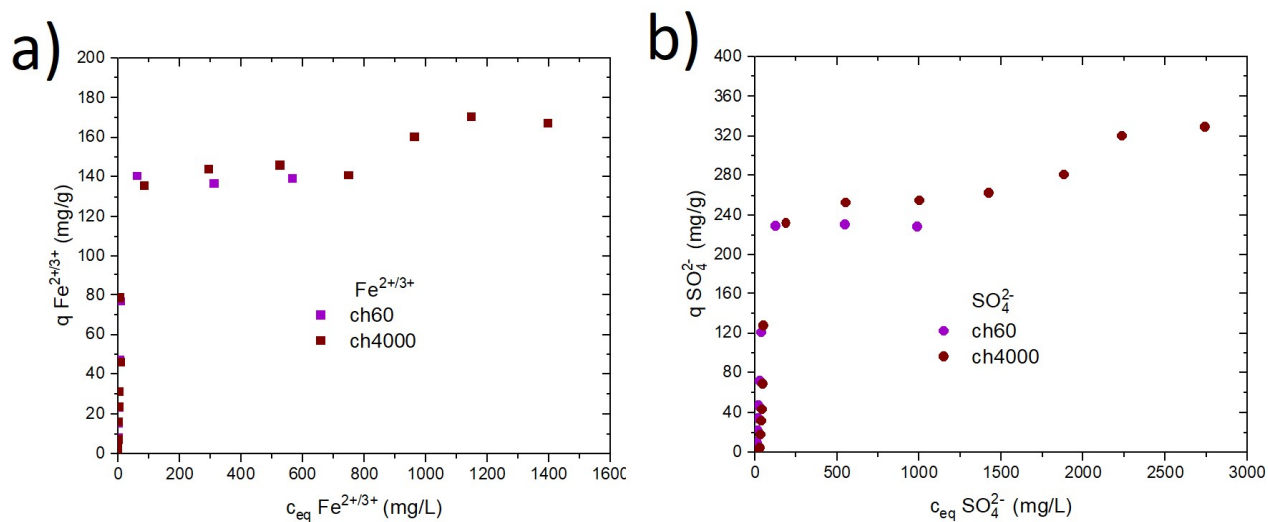

**Figure S15.** (a) Adsorption isotherm capacities for  $\text{Fe}^{2+/3+}$  and (b) Adsorption isotherms capacity for  $\text{SO}_4^{2-}$  from  $\text{FeSO}_4$  solution for ch60 (purple), and (b) ch4000 (brown).

### S11. pH values of ch60 and ch4000

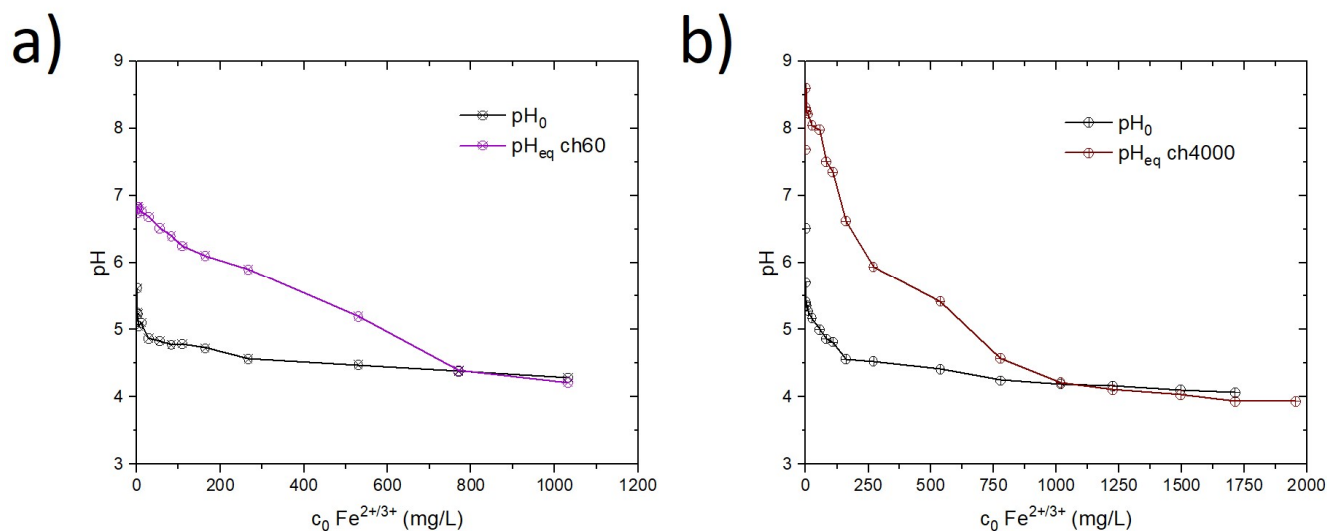

**Figure S16.** Corresponding  $\text{pH}_0$  and  $\text{pH}_{\text{eq}}$  values from adsorption of  $\text{FeSO}_4^{2-}$  onto (a) ch60 (purple), and (b) ch4000 (brown) with  $\text{pH}_0$  (grey) corresponds to the pH value of the adsorptive solution before the experiment and  $\text{pH}_{\text{eq}}$  corresponds to the pH value after the adsorption process.

### S12. Adsorption isotherms of $\text{FeSO}_4$ onto ps & ch60 (blue), ps & ch4000 (red), n.ps & ch60 (green), n.ps & ch4000 (orange).

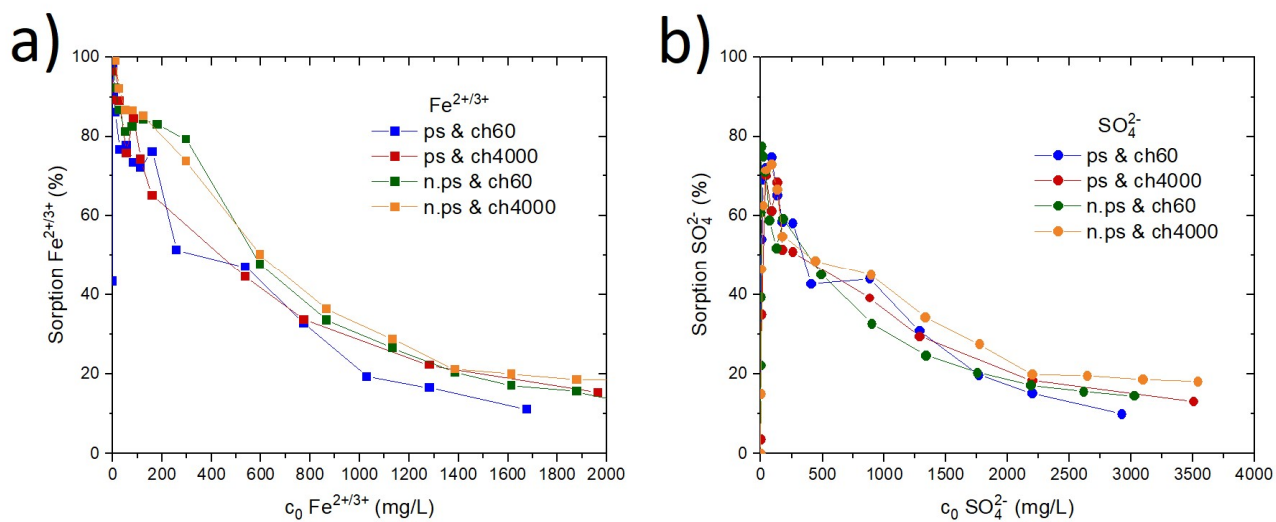

**Figure S17.** (a) percentage adsorption of  $\text{Fe}^{2+/3+}$  and (b) ) percentage adsorption of  $\text{SO}_4^{2-}$  from  $\text{FeSO}_4$  solution with ps & ch60 (dark blue), ps & ch4000 (red), n.ps & ch60 (green), and n.ps & ch4000 (orange).



**S13. pH Values of ps & ch60 (blue), ps & ch4000 (red), n.ps & ch60 (green), n.ps & ch4000 (orange).**

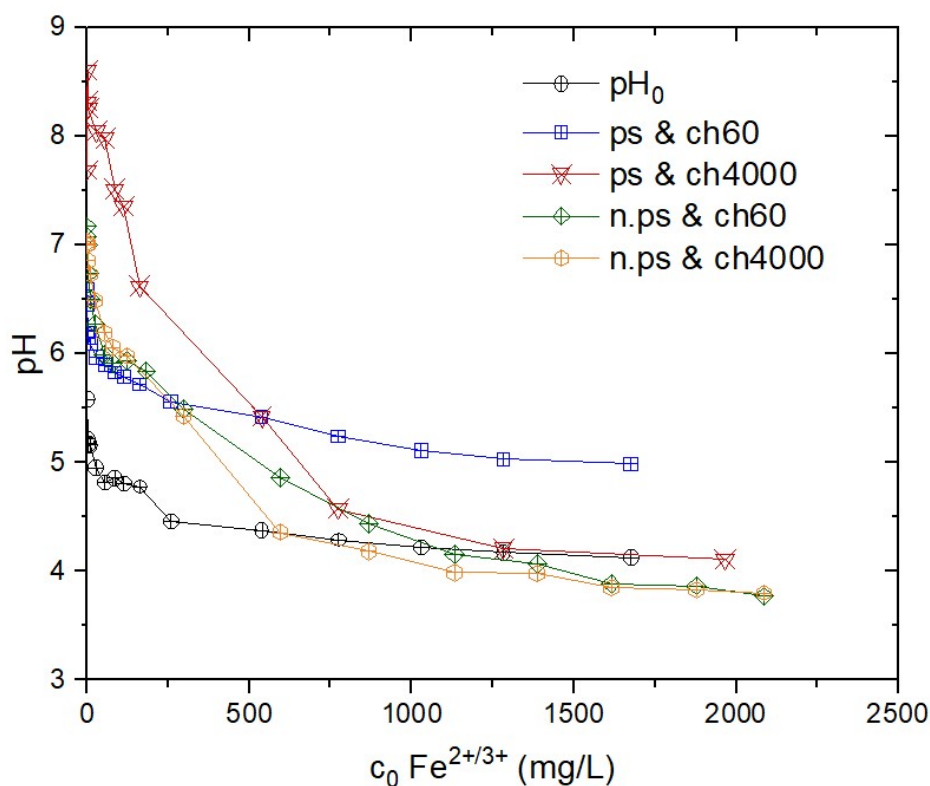

**Figure S18.** Corresponding  $pH_0$  and  $pH_{eq}$  values from adsorption of  $FeSO_4^{2-}$  onto ps & ch60 (dark blue), ps & ch4000 (red), n.ps & ch60 (green), and n.ps & ch4000 (orange). With  $pH_0$  (grey) corresponds to the pH value of the adsorptive solution before the experiment and  $pH_{eq}$  corresponds to the pH value after the adsorption process.

#### **S14. Adsorption isotherms fitted by Langmuir, Sips and Dubinin-Radushkevich.**

##### *S14.1. Langmuir Fitting Model*

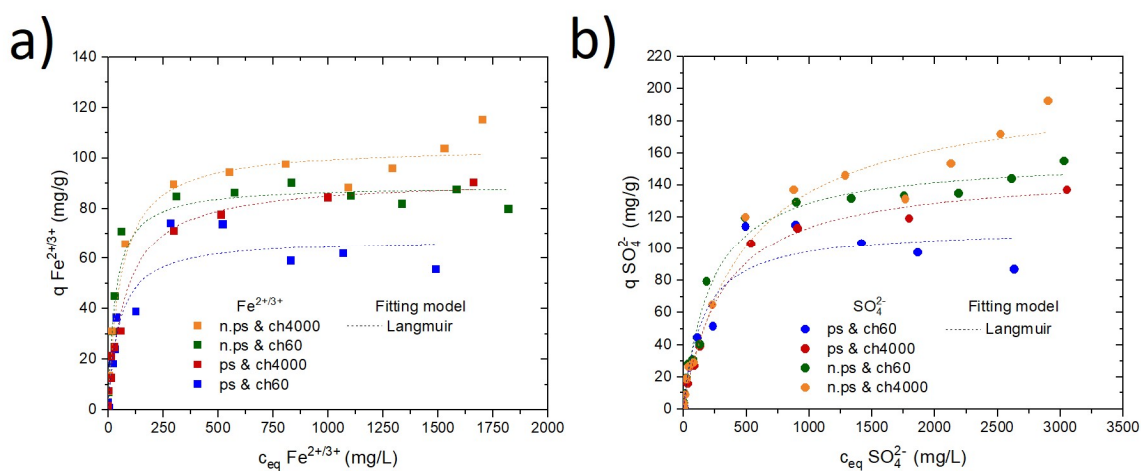

**Figure S19.** Adsorption isotherms capacity for (a)  $Fe^{2+/3+}$ , and (b)  $SO_4^{2-}$  from  $FeSO_4$  solution and the respective Langmuir isotherm fitting model.

### S14.2. Sips Fitting Model

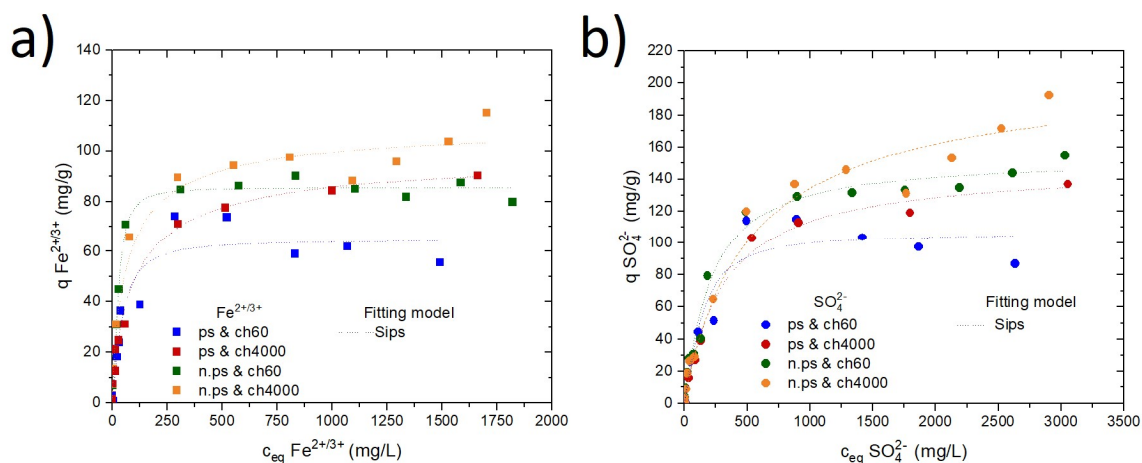

**Figure S20.** Adsorption isotherms capacity for (a)  $\text{Fe}^{2+/3+}$ , and (b)  $\text{SO}_4^{2-}$  from  $\text{FeSO}_4$  solution and the respective Sips isotherm fitting model.

### S14.3. Dubinin-Radushkevich Fitting Model

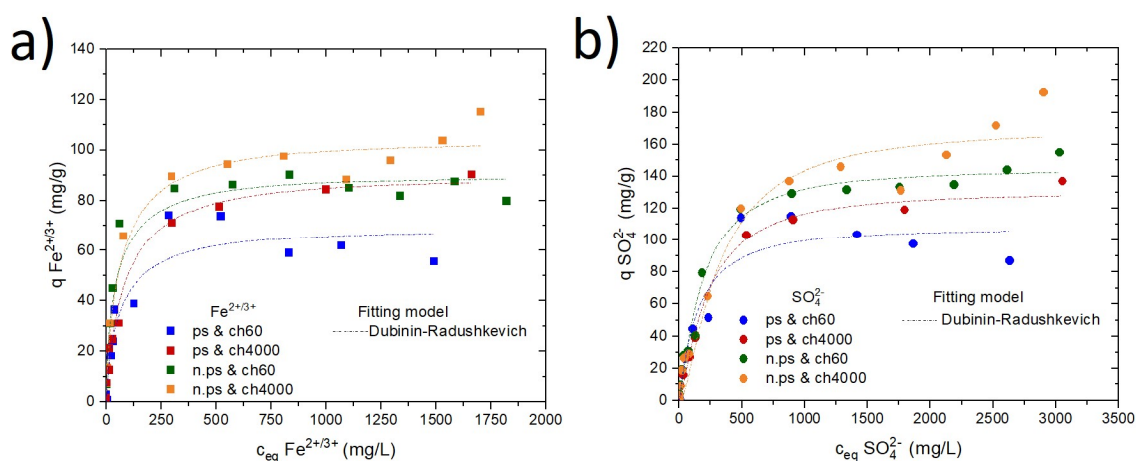

**Figure S21.** Adsorption isotherms capacity for (a)  $\text{Fe}^{2+/3+}$ , and (b)  $\text{SO}_4^{2-}$  from  $\text{FeSO}_4$  solution and the respective Dubinin-Radushkevich isotherm fitting model.

**Table S11.** Fitting parameters for the adsorption of Fe<sup>2+</sup> from FeSO<sub>4</sub> solution onto ps & ch60 (blue), ps & ch4000, n.ps & ch60, n.ps & ch4000 for Langmuir, Sips, and Dubinin-Radushkevich isotherm models.

| Sample        | Model                | Q <sub>m</sub><br>mg/g | K<br>L/mg      | β <sub>DR</sub> × 10 <sup>-9</sup><br>mol <sup>2</sup> /J <sup>2</sup> | n            | E <sub>ads,DR</sub><br>KJ/mol | R <sup>2</sup> (COD) |
|---------------|----------------------|------------------------|----------------|------------------------------------------------------------------------|--------------|-------------------------------|----------------------|
| ps & ch60     | Langmuir             | 67.98 ± 4.10           | 0.019 ± 0.005  | --                                                                     | --           | --                            | 0.938                |
|               | Sips                 | 64.60 ± 4.36           | 0.006 ± 0.009  | --                                                                     | 1.35 ± 0.43  | --                            | 0.944                |
|               | Dubinin-Radushkevich | 68.26 ± 3.87           | --             | 13.2 ± 2.05                                                            | --           | 61.5 ± 4.79                   | 0.933                |
| ps & ch4000   | Langmuir             | 91.65 ± 2.54           | 0.013 ± 0.001  | --                                                                     | --           | --                            | 0.990                |
|               | Sips                 | 99.96 ± 5.80           | 0.024 ± 0.006  | --                                                                     | 0.80 ± 0.08  | --                            | 0.993                |
|               | Dubinin-Radushkevich | 88.83 ± 2.07           | --             | 15.86 ± 9.5                                                            | --           | 56.14 ± 1.68                  | 0.990                |
| n.ps & ch60   | Langmuir             | 89.05 ± 2.16           | 0.031 ± 0.004  | --                                                                     | --           | --                            | 0.983                |
|               | Sips                 | 85.47 ± 1.09           | 0.0034 ± 0.001 | --                                                                     | 1.72 ± 0.15  | --                            | 0.995                |
|               | Dubinin-Radushkevich | 89.79 ± 2.71           | --             | 10.51 ± 1.01                                                           | --           | 68.94 ± 3.32                  | 0.972                |
| n.ps & ch4000 | Langmuir             | 104.98 ± 3.01          | 0.017 ± 0.002  | --                                                                     | --           | --                            | 0.981                |
|               | Sips                 | 111.11 ± 7.08          | 0.032 ± 0.013  | --                                                                     | 0.809 ± 0.13 | --                            | 0.983                |
|               | Dubinin-Radushkevich | 103.53 ± 2.57          | --             | 13.32 ± 1.15                                                           | --           | 61.43 ± 2.67                  | 0.982                |

**Table S12.** Fitting parameters for the adsorption of SO<sub>4</sub><sup>2-</sup> from FeSO<sub>4</sub> solution onto ps & ch60 (blue), ps & ch4000, n.ps & ch60, n.ps & ch4000 for Langmuir, Sips, and Dubinin-Radushkevich isotherm models.

| Sample        | Model                | Q <sub>m</sub><br>mg/g | K<br>L/mg      | β <sub>DR</sub> × 10 <sup>-9</sup><br>mol <sup>2</sup> /J <sup>2</sup> | n          | E <sub>ads,DR</sub><br>KJ/mol | R <sup>2</sup> (COD) |
|---------------|----------------------|------------------------|----------------|------------------------------------------------------------------------|------------|-------------------------------|----------------------|
| ps & ch60     | Langmuir             | 113.28 ± 8.02          | 0.006 ± 0.001  | --                                                                     | --         | --                            | 0.936                |
|               | Sips                 | 106.26 ± 8.42          | 0.0012 ± 0.002 | --                                                                     | 1.37 ± 0.4 | --                            | 0.943                |
|               | Dubinin-Radushkevich | 107.32 ± 5.72          | --             | 25.51 ± 4.09                                                           | --         | 44.26 ± 3.55                  | 0.942                |
| ps & ch4000   | Langmuir             | 148.89 ± 5.12          | 0.003 ± 0.0003 | --                                                                     | --         | --                            | 0.990                |
|               | Sips                 | 148.04 ± 9.07          | 0.0029 ± 0.001 | --                                                                     | 1.01 ± 0.1 | --                            | 0.991                |
|               | Dubinin-Radushkevich | 130.23 ± 4.25          | --             | 38.2 ± 3.38                                                            | --         | 36.17 ± 1.60                  | 0.982                |
| n.ps & ch60   | Langmuir             | 157.49 ± 4.47          | 0.004 ± 5.5    | --                                                                     | --         | --                            | 0.987                |
|               | Sips                 | 153.1 ± 7.09           | 0.002 ± 0.001  | --                                                                     | 1.09 ± 0.1 | --                            | 0.988                |
|               | Dubinin-Radushkevich | 144.81 ± 3.32          | --             | 31.6 ± 2.58                                                            | --         | 39.74 ± 1.62                  | 0.985                |
| n.ps & ch4000 | Langmuir             | 201.63 ± 12.41         | 0.002 ± 0.0004 | --                                                                     | --         | --                            | 0.971                |
|               | Sips                 | 207.50 ± 31.04         | 0.002 ± 0.002  | --                                                                     | 0.95 ± 0.2 | --                            | 0.970                |
|               | Dubinin-Radushkevich | 169.54 ± 6.85          | --             | 56.3 ± 8.17                                                            | --         | 29.79 ± 2.15                  | 0.963                |



**Table S13.** Adsorption of iron ions onto biopolymers.

| Materials                             | Adsorption capacity in<br>mg/g | Salts                                                       | Experimental conditions |            |             | Ref.      |
|---------------------------------------|--------------------------------|-------------------------------------------------------------|-------------------------|------------|-------------|-----------|
|                                       |                                |                                                             | pH                      | a.d in g/L | t, T        |           |
| <b>n.ps &amp; ch4000</b>              | <b>115</b>                     | <b>FeSO<sub>4</sub></b>                                     | 5.6                     | 3.33       | 24 h, 25 °C | This work |
| n.ps & ch60                           | 90                             | FeSO <sub>4</sub>                                           | 5.6                     | 3.33       | 24 h, 25 °C | This work |
| ps & ch4000                           | 80                             | FeSO <sub>4</sub>                                           | 5.6                     | 3.33       | 24 h, 25 °C | This work |
| ps & ch60                             | 61                             | FeSO <sub>4</sub>                                           | 5.6                     | 3.33       | 24 h, 25 °C | This work |
| Ch85/400/A2                           | 139                            | FeSO <sub>4</sub> ·7H <sub>2</sub> O FeSO <sub>4</sub> (aq) | --                      | 3.33       | 24 h, 25 °C | [34]      |
| Native potato starch                  | 0.65                           | FeSO <sub>4</sub> ·7H <sub>2</sub> O                        | 5.4                     | 3.33       | 2 h, 25 °C  | [8]       |
| Oxidized corn starch                  | 3.58                           | FeSO <sub>4</sub> ·7H <sub>2</sub> O                        | 5.4                     | 3.33       | 2 h, 25 °C  | [8]       |
| Oxidized potato starch                | 4.34                           | FeSO <sub>4</sub> ·7H <sub>2</sub> O                        | 5.4                     | 3.33       | 2 h, 25 °C  | [8]       |
| Helles brewer's<br>spent grain        | 10.2                           | FeSO <sub>4</sub> ·7H <sub>2</sub> O                        | 5.5                     | 3.33       | 24 h, 23 °C | [19]      |
| Wheat beer<br>brewer's spent<br>grain | 11.7                           | FeSO <sub>4</sub> ·7H <sub>2</sub> O                        | 5.5                     | 3.33       | 24 h, 23 °C | [19]      |

**Table S14.** Adsorption of sulfate ions onto biopolymers.

| Materials                | Adsorption capacity in<br>mg/g | Salts                                                       | Experimental conditions |            |             | Ref       |
|--------------------------|--------------------------------|-------------------------------------------------------------|-------------------------|------------|-------------|-----------|
|                          |                                |                                                             | pH                      | a.d in g/L | t, T        |           |
| <b>n.ps &amp; ch4000</b> | <b>192</b>                     | <b>FeSO<sub>4</sub></b>                                     | 5.6                     | 3.33       | 24 h, 25 °C | This work |
| n.ps & ch60              | 155                            | FeSO <sub>4</sub>                                           | 5.6                     | 3.33       | 24 h, 25 °C | This work |
| ps & ch4000              | 137                            | FeSO <sub>4</sub>                                           | 5.6                     | 3.33       | 24 h, 25 °C | This work |
| ps & ch60                | 97                             | FeSO <sub>4</sub>                                           | 5.6                     | 3.33       | 24 h, 25 °C | This work |
| Ch85/400/A2              | 220                            | FeSO <sub>4</sub> ·7H <sub>2</sub> O FeSO <sub>4</sub> (aq) | --                      | 3.33       | 24 h, 25 °C | [34]      |

## References

- Boughanmi, R.; Borchert, K.B.L.; Steinbach, C.; Mayer, M.; Schwarz, S.; Svirepa, A.; Schwarz, J.; Mertig, M.; Schwarz, D. Native and Oxidized Starch for Adsorption of Nickel, Iron, and Manganese Ions from Water. *Polysaccharides* **2022**, *3*, 556–573. <https://doi.org/10.3390/polysaccharides3030033>.
- Carrasco, K.H.; Höfgen, E.G.; Brunner, D.; Borchert, K.B.L.; Reis, B.; Steinbach, C.; Mayer, M.; Schwarz, S.; Glas, K.; Schwarz, D. Removal of Iron, Manganese, Cadmium, and Nickel Ions Using Brewers' Spent Grain. *Polysaccharides* **2022**, *3*, 356–379, <https://doi.org/10.3390/polysaccharides3020021>.
- Weißpflog, J.; Gündel, A.; Vehlow, D.; Steinbach, C.; Müller, M.; Boldt, R.; Schwarz, S.; Schwarz, D. Solubility and Selectivity Effects of the Anion on the Adsorption of Different Heavy Metal Ions onto Chitosan. *Molecules* **2020**, *25*, 2482. <https://doi.org/10.3390/molecules25112482>.
